# Supplementary material
Source: MDPI journal article supplement (https://www.mdpi.com/2073-4395/11/4/629)
Supplement: s1 [file s1]

Supplementary material for

# Biochar for circular horticulture: feedstock related effects in soilless cultivation

Fien Amery<sup>1,\*</sup>, Jane Debode<sup>1</sup>, Sarah Ommeslag<sup>1</sup>, Rian Visser<sup>2</sup>, Caroline De Tender<sup>1,3</sup>, Bart Vandecasteele<sup>1</sup>

<sup>1</sup> Flanders Research Institute for Agriculture, Fisheries and Food, Plant Sciences Unit, Burg. Van Gansberghelaan 109, 9820 Merelbeke, Belgium

<sup>2</sup> ECN part of TNO, Westerduinweg 3, 1755 ZG Petten, The Netherlands

<sup>3</sup> Department of Applied Mathematics, Computer Science and Statistics, Ghent University, Krijgslaan 281 S9, 9000 Ghent, Belgium

\* Correspondence: Corresponding author: Fien.Amery@ilvo.vlaanderen.be

## More details on Materials and Methods of the greenhouse strawberry trial

### 2.3.2. Experimental set-up

Strawberry plants were grown in 1.5 L pots containing Prelvex white peat 100% (AVEVE Lammens, Wetteren, Belgium), mixed with different PGMix fertilizer doses (0.70, 1.05, 1.40 and 1.75 g PGMix per L) and 1.43 g per L lime (RHP, MG's-Gravenzande, The Netherlands). For the biochar treatments, the peat substrate with 1.05 g PGMix per L was mixed with 2 g dry matter (DM) biochar per L peat substrate. Shortly after production and prior to use in the peat blends, the For650, Speat650 and Scoir650 biochars were moistened and allowed to equilibrate for several weeks to avoid any hydrophobic effects. All blends were wetted to obtain 40% water-filled pore space (WFPS), put in a closed bag and pre-incubated at 15 °C for 1 week. Cold-stored bare-root strawberry transplants (cultivar Elsanta) were planted in all pots with pre-incubated blends. The pots were arranged in a semi-randomized design in the greenhouse and plants were grown for 11 weeks at 20 °C. In total, 6 biological replicates per treatment were sampled at the end of the experiment.

Every week, the moisture content of the substrate was adjusted to 40% WFPS based on mass loss recorded for each pot separately. Nutrient or salt losses by leaching from pots was avoided. The water volume added per pot was recorded during the whole experiment. The total water use during the experiment was expressed per pot, thus expressing the net effect of both transpiration by the strawberry plant and evaporation from the growing medium. No additional fertilizer was applied during plant growth.

Chlorophyll content was estimated, as described in detail by Debode *et al.* {Debode, 2018 #1340; Vandecasteele, 2021 #1361} for each of the three separate leaflets of two fully grown compound leaves of these six plants per treatment using a CCM-200 chlorophyll content meter (Opti-Sciences Inc., Hudson, NH, USA). The output was expressed in Chlorophyll Concentration Index (CCI), defined as the ratio of transmission at 931 to 653 nm through a leaf (Opti-Sciences Inc., USA). Total plant CCI was calculated as a weighted average based on individual leaf area.

Plant leaves of 4 plants per treatment were inoculated after ten weeks of plant growth with *B. cinerea* isolate PCF895 [42] according to the method of Harel *et al.* [26] and described in detail by De Tender *et al.* {De Tender, 2016 #1215; Vandecasteele, 2021 #1361}. Two plants per treatment were inoculated with sterile potato dextrose agar plugs. The resulting lesions on the leaflets were recorded one week after inoculation using a 0-4 disease scale. This scoring was used to calculate the disease severity index (DSI) per plant (i), used as input for statistical analysis.

$$DSI_i = 100 \times \frac{1 \times n_{i1} + 2 \times n_{i2} + 3 \times n_{i3} + 4 \times n_{i4}}{4 \times n_i}$$

Where  $n_{i1}, \dots, n_{i4}$  represent the number of leaves of each infection score and  $n_i = \sum_{l=0}^4 n_{il} = 9$  is the number of leaves measured for each plant. This index has values in the interval (0,100), with a minimum index if all leaves score 0 and a maximum when all leaves score 4. Inoculated leaves remained on the plant until the end of the experiment. For plant leaf infection, the DSI was used as response variable for disease score.

### 2.3.3. Chemical characterization of the growing media, plant leaves and strawberry fruits

In total, six biological replicates were studied per treatment. "Leaf" is defined as the aboveground vegetative biomass, including stalks and the three separate leaflets of the compound leaves. Leaves were dried at 70 °C and ground, and the material of one plant (one pot) was considered as one biological replicate. Fruits were collected during the trial, and one sample per plant for the whole trial was freeze-dried before grinding. Total N was determined by Thermo scientific – flash 4000 N analyzer (ISO 16634-1), total concentrations of P, K, Mg and Ca were determined by 5110 VDV Agilent ICP-OES in the extract following digestion of 0.5 g dried and ground material with 4 mL HNO<sub>3</sub> (p.a. 65 %) and 12 mL HCl (p.a. 37%) using a SCP Digiprep MS 200 heating block. Assessment of optimal range and nutrient deficiency for foliar composition is based on Pritts *et al.* [46]. Total uptake in the leaves and fruits was calculated by multiplying the measured concentration with the dry mass of leaves/fruits.

**Table S1.** Biochars tested in different experiments (codes of the biochars: see Table 1. Ref biochar: reference biochar based on stone oak wood)

| Process           | Chemical characterisation | Leaching experiment<br>(10 volume% biochar/ 90%<br>limed peat) | Greenhouse trial<br>(2 g DM L <sup>-1</sup> limed peat) |
|-------------------|---------------------------|----------------------------------------------------------------|---------------------------------------------------------|
| Reference biochar | x                         | x                                                              | x                                                       |
| Flax650           | x                         | x                                                              |                                                         |
| Flax400           | x                         |                                                                |                                                         |
| Misc650           | x                         | x                                                              |                                                         |
| Misc400           | x                         |                                                                |                                                         |
| For650            | x                         | x                                                              | x                                                       |
| For400            | x                         | x                                                              |                                                         |
| Speat650          | x                         | x                                                              | x                                                       |
| Speat400          | x                         |                                                                |                                                         |
| Speat3-650        | x                         |                                                                |                                                         |
| Scoir650          | x                         | x                                                              | x                                                       |
| Scoir4-650        | x                         |                                                                |                                                         |

**Table S2.** Available elements extracted in water (H<sub>2</sub>O) or ammonium acetate (aa) in mg (L biochar)<sup>-1</sup>, of spent growing media (SGM) feedstocks (below the line) and biochars,(above the line) including the ref biochar (reference biochar based on stone oak wood). See m&m for full details.

| Code        | Matrix          | Feedstock                     | NO <sub>3</sub> -N | NH <sub>4</sub> -N | SO <sub>4</sub> | Cl   | C    | Na   | P    | K    | Ca      | Mg   | Mn    |
|-------------|-----------------|-------------------------------|--------------------|--------------------|-----------------|------|------|------|------|------|---------|------|-------|
|             |                 |                               | H <sub>2</sub> O   |                    |                 |      |      | aa   |      |      |         |      |       |
| Ref biochar | biochar         | Reference biochar             | < 5                | < 5                | 60              | 30   | 528  | 54.9 | 150  | 3139 | 11478   | 487  | 44.2  |
| Flax650     | biochar, 650 °C | Flax shives                   | < 5                | < 5                | 45              | 51   | 2410 | 35.0 | 91   | 603  | 380     | < 76 | 2.2   |
| Flax400     | biochar, 400 °C | Flax shives                   | < 5                | < 5                | 25              | < 10 | 195  | <25  | 105  | 384  | 447     | < 76 | 2.6   |
| Misc650     | biochar, 650 °C | Miscanthus straw              | < 5                | < 5                | 17              | 17   | 1612 | <25  | < 14 | 245  | < 105,0 | < 76 | 3.3   |
| Misc400     | biochar, 400 °C | Miscanthus straw              | < 5                | < 5                | < 12            | < 10 | 80   | <25  | < 14 | 83   | < 105   | < 76 | 5.3   |
| For650      | biochar, 650 °C | wood from forestry management | < 5                | < 5                | 17              | 27   | 2109 | 32.8 | < 14 | 455  | 221     | < 76 | <1.5  |
| For400      | biochar, 400 °C | wood from forestry management | < 5                | < 5                | 30              | 26   | 1391 | <25  | 19   | 220  | 196     | < 76 | 1.6   |
| Speat650    | biochar, 650 °C | Spent peat, batch1            | < 5                | < 5                | 1220            | 136  | 665  | 155  | 57   | 667  | 1677    | 117  | 12.9  |
| Speat400    | biochar, 400 °C | Spent peat, batch1            | < 5                | < 5                | 1427            | 163  | 807  | 204  | 181  | 812  | 5598    | 552  | 35    |
| Scoir650    | biochar, 650 °C | Spent coir, batch2            | < 5                | < 5                | 378             | 151  | 1716 | 114  | 68   | 660  | 500     | 76   | < 1.5 |
| Speat3-650  | biochar, 650 °C | Spent peat, batch3            | < 5                | < 5                | 735             | 229  | 347  | 141  | 57   | 1043 | 4036    | 344  | 37    |
| Scoir4-650  | biochar, 650 °C | Spent coir, batch4            | < 5                | < 5                | 170             | 270  | 351  | 221  | 60   | 465  | 1539    | 100  | 25    |
|             | SGM             | Spent peat, batch1            | 127                | < 5                | 734             | 33   | 313  | 12   | 32   | 320  | 2067    | 251  | 2     |
|             | SGM             | Spent coir, batch2            | 120                | 26                 | 147             | 56   | 115  | 8    | 41   | 247  | 639     | 76   | < 1.5 |
|             | SGM             | Spent peat, batch3            | 200                | 22                 | 769             | 88   | 633  | 89   | 42   | 480  | 2594    | 337  | 8     |
|             | SGM             | Spent coir, batch4            | 216                | 43                 | 252             | 168  | 653  | 148  | 50   | 285  | 2042    | 240  | 21    |

**Table S3.** Characteristics of the white peat (not limed, except for the CEC and pH: these were measured on the limed peat) used in the leaching experiment. Available elements were extracted in water (H<sub>2</sub>O) or ammonium acetate (aa). DM: dry matter, EC: electrical conductivity, CEC: cation exchange capacity

| <b>Parameter</b>                      |                                    |       |
|---------------------------------------|------------------------------------|-------|
| pH-H <sub>2</sub> O                   | -                                  | 5.0   |
| EC                                    | μS cm <sup>-1</sup>                | 12    |
| Bulk density                          | g (L fresh weight) <sup>-1</sup>   | 150   |
| Total OM                              |                                    | 949   |
| Total N                               |                                    | 10.5  |
| Total P                               |                                    | 0.25  |
| Total K                               |                                    | 0.25  |
| Total Ca                              | g (kg DM) <sup>-1</sup>            | 5.40  |
| Total Mg                              |                                    | 0.65  |
| Total Na                              |                                    | 0.07  |
| Total Fe                              |                                    | 1.05  |
| Total Al                              |                                    | 0.79  |
| NO <sub>3</sub> -N (H <sub>2</sub> O) |                                    | <5.0  |
| NH <sub>4</sub> -N (H <sub>2</sub> O) |                                    | <5.0  |
| SO <sub>4</sub> (H <sub>2</sub> O)    | mg L <sup>-1</sup>                 | <11.7 |
| Cl (H <sub>2</sub> O)                 |                                    | <10   |
| Na (aa)                               |                                    | <25   |
| K (aa)                                |                                    | <36   |
| P (aa)                                |                                    | <14   |
| Ca (aa)                               | mg L <sup>-1</sup>                 | 442   |
| Mg (aa)                               |                                    | <76   |
| CEC                                   | cmol <sub>c</sub> kg <sup>-1</sup> | 127   |

**Table S4.** Mean water use (standard error in brackets) of the different treatments in the strawberry field trial

| <b>Treatment: limed peat +</b>                                    | <b>Mean Water Use (g)</b> |
|-------------------------------------------------------------------|---------------------------|
| 1.05 g PGMix L <sup>-1</sup>                                      | 6098 (147)                |
| 0.70 g PGMix L <sup>-1</sup>                                      | 6459 (110)                |
| 1.40g g PGMix L <sup>-1</sup>                                     | 6755 (85)                 |
| 1.75 g PGMix L <sup>-1</sup>                                      | 6904 (193)                |
| 1.05 g PGMix L <sup>-1</sup> + Ref Biochar (2 g L <sup>-1</sup> ) | 6641 (165)                |
| 1.05 g PGMix L <sup>-1</sup> + For650 (2 g L <sup>-1</sup> )      | 6258 (263)                |
| 1.05 g PGMix L <sup>-1</sup> + Speat650 ( 2 g L <sup>-1</sup> )   | 6201 (244)                |
| 1.05 g PGMix L <sup>-1</sup> + Scoir650 (2 g L <sup>-1</sup> )    | 6621 (69)                 |

**Table S5.** Initial and final pH, electrical conductivity (EC) and water-extractable nutrients at the start and the end of the strawberry trial, analyzed on a composite sample of the peat blend per treatment. Codes of the biochars: see Table 1. Ref biochar: reference biochar based on stone oak wood. PGMix: Multi-mix Potting Soil 14+16+18 mineral fertilizer.

| Treatment: limed peat +                                           | pH-H <sub>2</sub> O | EC                  | NO <sub>3</sub> -N         | NH <sub>4</sub> -N | SO <sub>4</sub> | Cl   | P     |
|-------------------------------------------------------------------|---------------------|---------------------|----------------------------|--------------------|-----------------|------|-------|
|                                                                   | -                   | μS cm <sup>-1</sup> | mg (L blend) <sup>-1</sup> |                    |                 |      |       |
| Initial                                                           |                     |                     |                            |                    |                 |      |       |
| 0.70 g PGMix L <sup>-1</sup>                                      | 4.88                | 277                 | 51                         | 55                 | 170             | < 10 | 47    |
| 1.05 g PGMix L <sup>-1</sup>                                      | 4.83                | 446                 | 93                         | 108                | 367             | < 10 | 97    |
| 1.40 g PGMix L <sup>-1</sup>                                      | 4.79                | 565                 | 122                        | 121                | 393             | < 10 | 120   |
| 1.75 g PGMix L <sup>-1</sup>                                      | 4.77                | 570                 | 122                        | 130                | 405             | < 10 | 127   |
| 1.05 g PGMix L <sup>-1</sup> + Ref biochar (2 g L <sup>-1</sup> ) | 4.88                | 404                 | 81                         | 89                 | 285             | < 10 | 73    |
| 1.05 g PGMix L <sup>-1</sup> + For650 (2 g L <sup>-1</sup> )      | 4.84                | 378                 | 56                         | 91                 | 315             | < 10 | 74    |
| 1.05 g PGMix L <sup>-1</sup> + Speat650 (2 g L <sup>-1</sup> )    | 4.88                | 349                 | 48                         | 80                 | 302             | < 10 | 66    |
| 1.05 g PGMix L <sup>-1</sup> + Scoir650 (2 g L <sup>-1</sup> )    | 4.85                | 339                 | 52                         | 71                 | 254             | < 10 | 68    |
| Final                                                             |                     |                     |                            |                    |                 |      |       |
| 0.70 g PGMix L <sup>-1</sup>                                      | 4.59                | 72                  | < 5.0                      | < 5.0              | 70              | < 10 | < 4.7 |
| 1.05 g PGMix L <sup>-1</sup>                                      | 4.18                | 119                 | < 5.0                      | < 5.0              | 162             | < 10 | 19    |
| 1.40 g PGMix L <sup>-1</sup>                                      | 4.19                | 149                 | < 5.0                      | 6                  | 208             | < 10 | 28    |
| 1.75 g PGMix L <sup>-1</sup>                                      | 4.16                | 236                 | 19                         | 14                 | 294             | < 10 | 58    |
| 1.05 g PGMix L <sup>-1</sup> + Ref biochar (2 g L <sup>-1</sup> ) | 4.47                | 89                  | < 5.0                      | < 5.0              | 117             | < 10 | 7     |
| 1.05 g PGMix L <sup>-1</sup> + For650 (2 g L <sup>-1</sup> )      | 4.28                | 96                  | < 5.0                      | < 5.0              | 135             | < 10 | 8     |
| 1.05 g PGMix L <sup>-1</sup> + Speat650 (2 g L <sup>-1</sup> )    | 4.33                | 113                 | < 5.0                      | < 5.0              | 167             | < 10 | 10    |
| 1.05 g PGMix L <sup>-1</sup> + Scoir650 (2 g L <sup>-1</sup> )    | 4.29                | 112                 | < 5.0                      | < 5.0              | 165             | < 10 | 16    |

**Table S6.** Ammonium acetate extractable nutrients at the start of the strawberry trial, analysed on a composite sample of the peat blend per treatment. Codes of the biochars: see Table 1. Ref biochar: reference biochar based on stone oak wood. PGMix: Multi-mix Potting Soil 14+16+18 mineral fertilizer.

| Treatment: limed peat +                                           | P                          | K   | Ca   | Mg  | Na   |
|-------------------------------------------------------------------|----------------------------|-----|------|-----|------|
|                                                                   | mg (L blend) <sup>-1</sup> |     |      |     |      |
| 0.70 g PGMix L <sup>-1</sup>                                      | 51                         | 155 | 1043 | 184 | < 25 |
| 1.05 g PGMix L <sup>-1</sup>                                      | 102                        | 265 | 1083 | 193 | < 25 |
| 1.40 g PGMix L <sup>-1</sup>                                      | 109                        | 321 | 993  | 178 | < 25 |
| 1.75 g PGMix L <sup>-1</sup>                                      | 143                        | 386 | 933  | 171 | < 25 |
| 1.05 g PGMix L <sup>-1</sup> + Ref biochar (2 g L <sup>-1</sup> ) | 82                         | 255 | 1021 | 162 | < 25 |
| 1.05 g PGMix L <sup>-1</sup> + For650 (2 g L <sup>-1</sup> )      | 75                         | 188 | 903  | 155 | < 25 |
| 1.05 g PGMix L <sup>-1</sup> + Speat650 (2 g L <sup>-1</sup> )    | 77                         | 226 | 961  | 160 | < 25 |
| 1.05 g PGMix L <sup>-1</sup> + Scoir650 (2 g L <sup>-1</sup> )    | 64                         | 202 | 805  | 137 | < 25 |

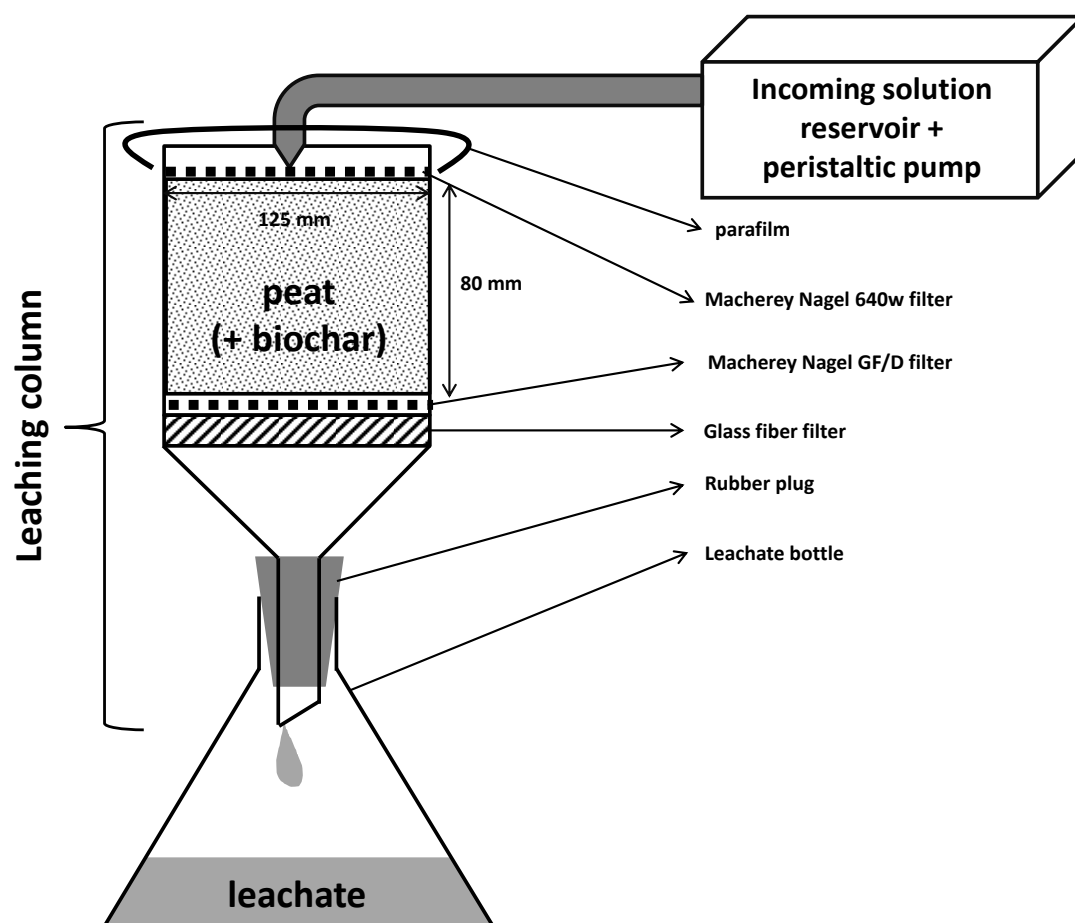

**Figure S1.** Overview of the setup of the leaching experiment (adapted from [1]).

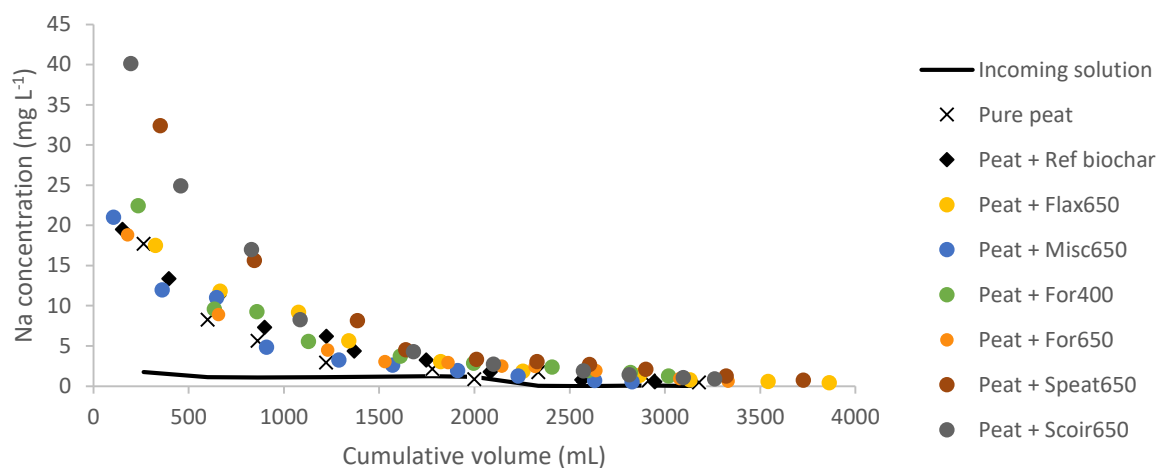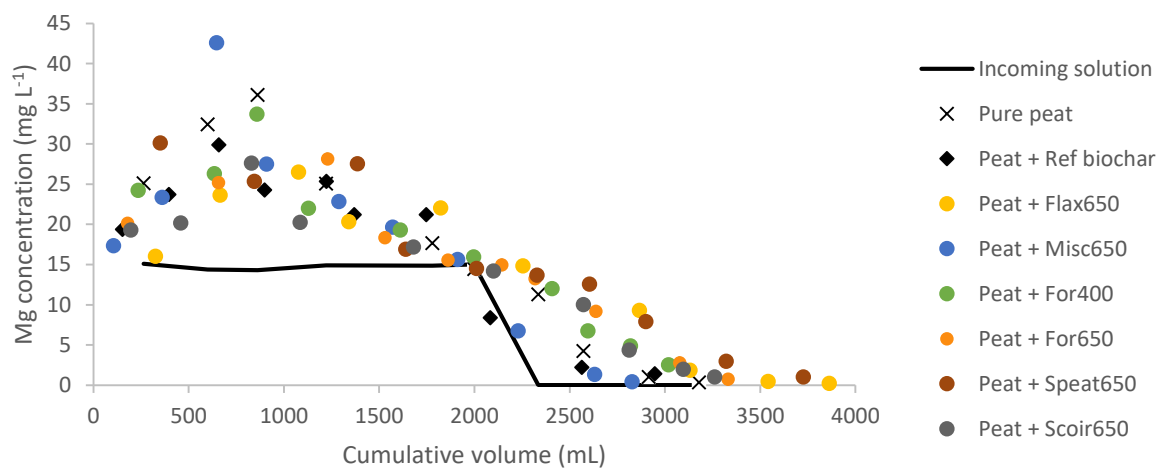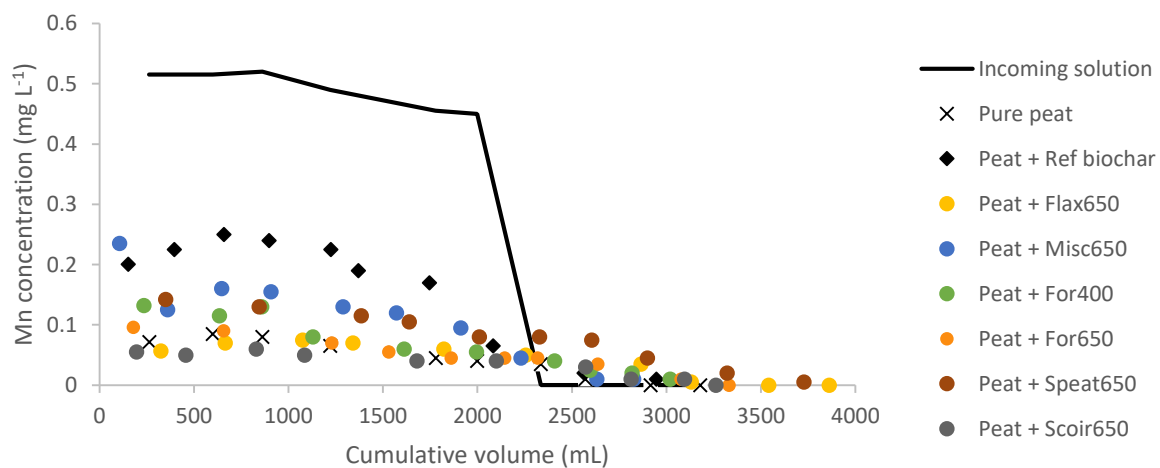

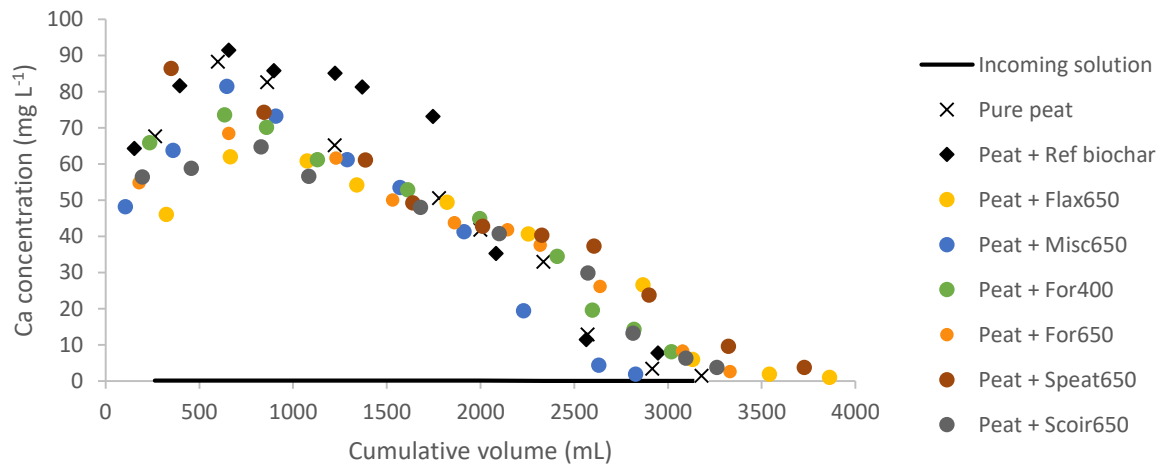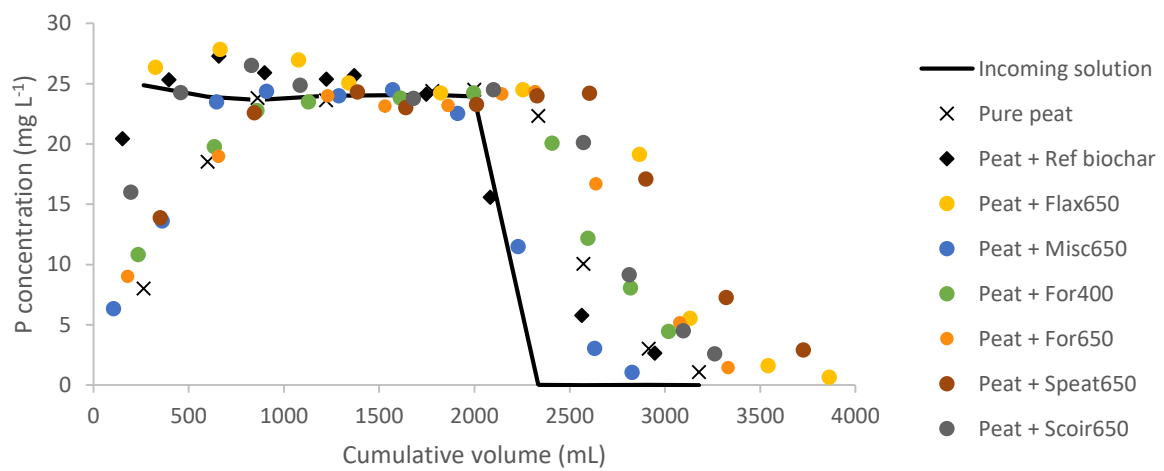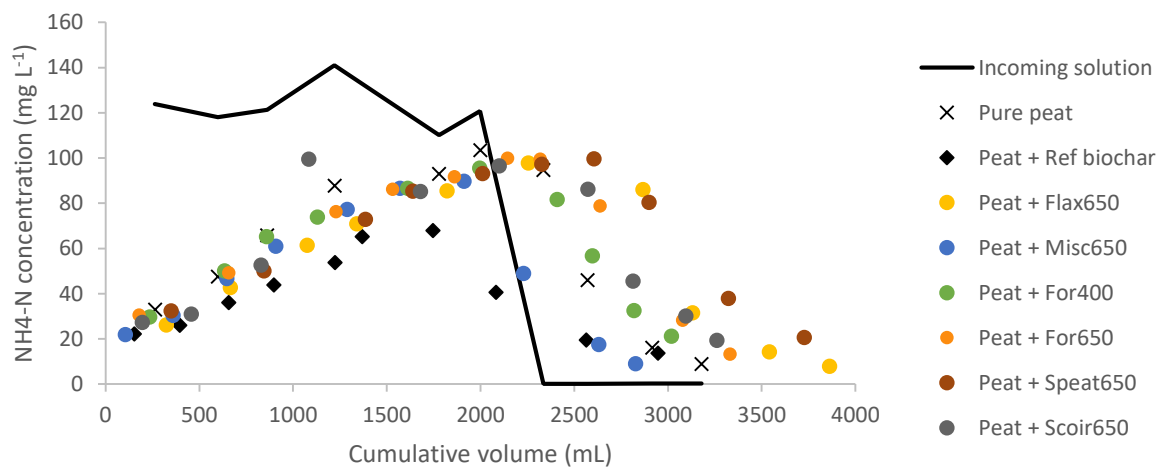

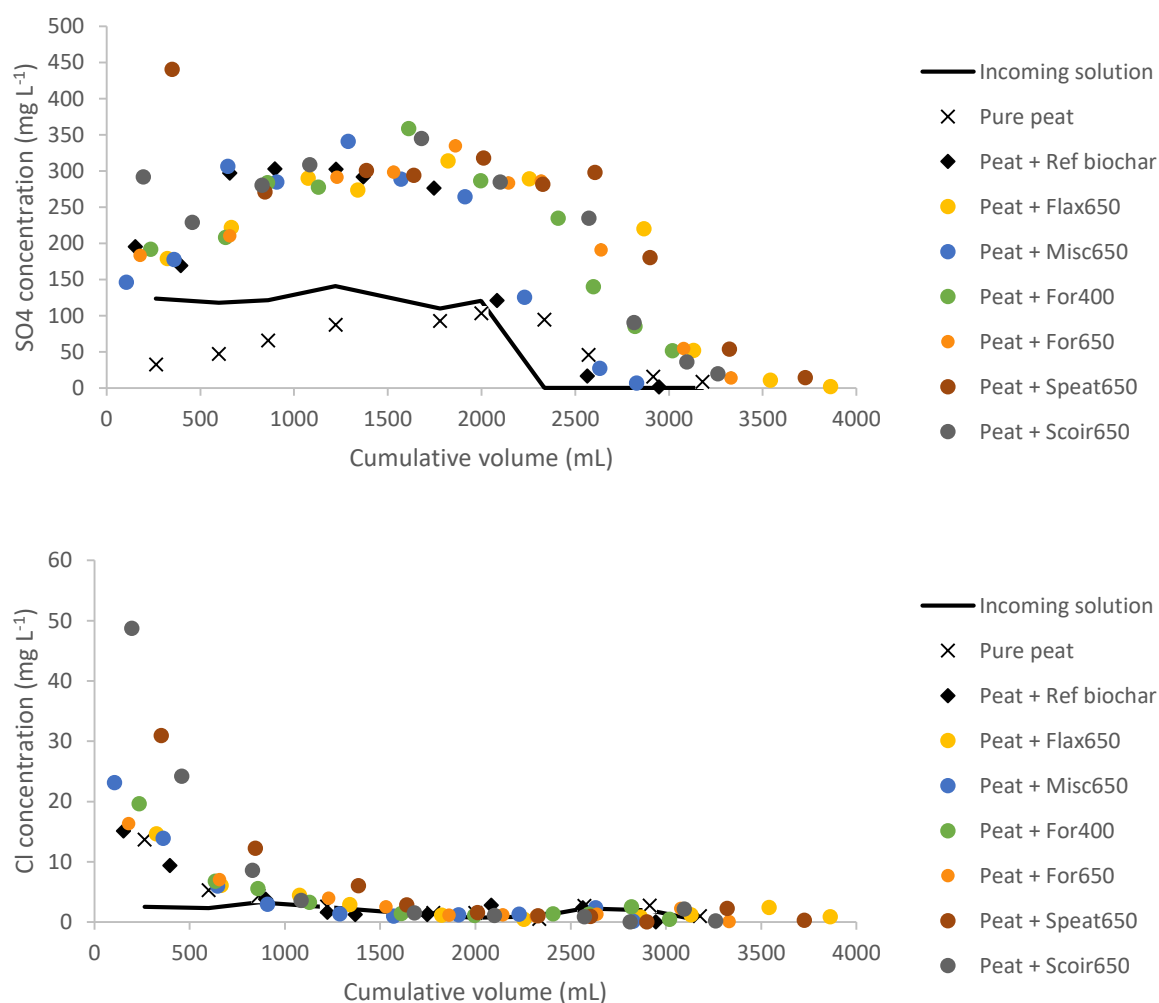

**Figure S2.** Average concentration (of 2 replicates) of Na, Mg, Mn, Ca, P, NH<sub>4</sub>-N, SO<sub>4</sub> and Cl in the leachate of the peat and peat blend columns. The solid black line represents the incoming solution concentration (first phase: fertigation solution, second phase: water). Codes of biochars: see Table 1. Ref biochar: reference biochar based on stone oak wood.

## Reference

1. Vanden Nest, T.; Vandecasteele, B.; Ruysschaert, G.; Cougnon, M.; Merckx, R. Effect of organic and mineral fertilizers on soil P and C levels, crop yield and P leaching in a long term trial on a silt loam soil. *Agriculture, Ecosystems and Environment* **2014**, *197*, 309-317.
